# Supplementary material
Source: PubMed Central journal article supplement (PMC2066015)

## ORIGINAL ARTICLE

# Una mezcla de oligosacáridos prebióticos reduce la incidencia de dermatitis atópica durante los primeros seis meses de vida

G. Moro, S. Arslanoglu, B. Stahl, J. Jelinek, U. Wahn, G. Boehm

Arch Dis Child 2006; 91:814-819. doi: 10.1136/adc.2006.098251

**Antecedentes:** Los oligosacáridos pueden alterar el desarrollo inmunitario posnatal al influir en la composición de la microflora bacteriana gastrointestinal.

**Objetivos:** Investigar el efecto de una mezcla prebiótica de galactoligosacáridos y fructoligosacáridos de cadena larga sobre la incidencia de dermatitis atópica (DA) durante los primeros seis meses de vida en lactantes con alto riesgo de atopia alimentados con leche infantil.

**Métodos:** Ensayo prospectivo, doble ciego, aleatorizado y controlado con placebo; se incluyó a 259 lactantes con riesgo de atopia. En total, 102 lactantes del grupo de prebióticos y 104 lactantes del grupo placebo completaron el estudio. Si se iniciaba la alimentación con leches infantiles, se asignaba aleatoriamente a los lactantes a uno de los dos grupos de alimentación con una leche infantil de proteínas hidrolizadas y 0,8 g/100 ml de prebióticos o maltodextrina como placebo (en el grupo de control). Se examinó a todos los lactantes para detectar posibles signos clínicos de dermatitis atópica. En un subgrupo de 98 lactantes se analizó la microflora fecal.

**Resultados:** Diez lactantes (9,8%; IC del 95%, 5,4%-17,1%) del grupo de intervención y 24 (23,1%; IC del 95%, 16,0%-32,1%) del grupo de control presentaron DA. La dieta no influyó en la intensidad de la dermatitis. Los lactantes alimentados con suplementos prebióticos presentaron un número significativamente mayor de bifidobacterias fecales que los del grupo de control, pero no hubo una diferencia significativa en los recuentos de lactobacilos.

**Conclusión:** Los resultados de este estudio demuestran por primera vez que los prebióticos reducen la incidencia de dermatitis atópica en una población de lactantes de alto riesgo. Aunque el mecanismo de este efecto requiere más investigación, parece probable que los oligosacáridos regulen el desarrollo inmunitario posnatal al modificar la microflora intestinal y podrían ser útiles en la prevención primaria de la alergia durante la infancia.

Al final del artículo figuran las adscripciones de los autores.

Correspondencia:  
Prof. Dr. med. habil. G. Boehm, Numico Research Germany, Bahnstr. 14-30, 61381 Friedrichsdorf, Alemania. Correo electrónico: guenther.boehm@milupa.de

Aceptado el 19 de junio de 2006. Publicado primero en internet el 27 de julio de 2006.

La prevalencia de las enfermedades atópicas ha aumentando de forma continua en los países desarrollados en los últimos diez años<sup>1-3</sup>. La composición de la microflora intestinal es un factor crucial que influye en el desarrollo del sistema inmunitario después del nacimiento<sup>4</sup>. Los oligosacáridos neutros presentes en la leche humana influyen de forma importante para que la microflora intestinal esté dominada por bifidobacterias y lactobacilos<sup>5,6</sup>. Basándose en el análisis de los oligosacáridos de la leche humana, se ha desarrollado una mezcla prebiótica compuesta en un 90% por galactoligosacáridos (GOS) de cadena corta y en un 10% por fructoligosacáridos (FOS) de cadena larga<sup>7,8</sup>. Los estudios realizados en lactantes prematuros<sup>9</sup> y nacidos a término<sup>10-12</sup> han demostrado que la alimentación complementada con GOS/FOS da lugar a una microflora intestinal similar a la que presentan los lactantes alimentados con leche materna. La dermatitis atópica (DA) es habitualmente la primera manifestación de la alergia al principio

de la lactancia. Se ha comunicado que la DA se asocia a un retraso de la maduración de las respuestas inmunitarias de los TH1 al principio de la lactancia y a concentraciones elevadas de IgE total e IgE específica frente a los antígenos de la dieta presentes en el suero<sup>13</sup>. Los lactantes con alergia de inicio precoz también tienen riesgo de presentar otras manifestaciones alérgicas, un fenómeno denominado marcha alérgica<sup>14</sup>. La microflora intestinal forma parte de un ecosistema complejo y aún no se han identificado muchas de las bacterias que la componen<sup>15</sup>. No obstante, hay pruebas convincentes de que la composición de la microflora intestinal influye en el desarrollo del sistema inmunitario después del nacimiento<sup>16</sup>. La es-

**Abreviaturas:** DA = dermatitis atópica; FOS = fructo-oligosacáridos; GOS = galacto-oligosacáridos; OSLH = oligosacáridos de la leche humana.

timulación de toda la microflora intestinal con prebióticos podría ser un método más eficaz para alterar el desarrollo inmunitario que la adición de una única especie bacteriana al ecosistema intestinal. Sin embargo, se han obtenido resultados positivos con probióticos<sup>17</sup>. El objetivo del presente estudio era investigar el efecto de una leche infantil para lactantes complementada con 0,8 g/100 ml de una mezcla de GOS/FOS sobre la incidencia de DA durante los primeros seis meses de vida. Se planteó la hipótesis de que la leche infantil prebiótica reduciría significativamente la incidencia acumulada de DA en lactantes de alto riesgo a los 6 meses de edad en comparación con un grupo control de lactantes alimentados con una leche infantil de idéntica composición, pero sin GOS/FOS.

### POBLACIÓN Y MÉTODOS DEL ESTUDIO

El estudio fue un ensayo doble ciego, aleatorizado, de grupos paralelos y controlado con placebo. Se obtuvo el consentimiento informado por escrito de los padres de todos los lactantes participantes y el protocolo del estudio fue aprobado por el Comité de Ética de Investigación Clínica de la Maternidad Macedonio Melloni de Milán, Italia. Eran elegibles para el estudio los lactantes nacidos a término entre el 1 de abril de 2003 y el 31 de marzo de 2005 en la Maternidad Macedonio Melloni de Milán cuyo padre o madre tenían antecedentes de eczema atópico, rinitis alérgica o asma. En todos los casos, el diagnóstico de los padres se basó en un certificado médico documentado.

De acuerdo con la política de fomento de la lactancia materna del hospital, se recomendó a todas las madres que dieran de mamar a sus hijos.

Se dio información sobre el estudio a los padres después del alta de la Unidad de Maternidad y se les pidió que se pusieran en contacto con el hospital si empezaban a alimentar a sus hijos con leche infantil. Los criterios de inclusión fueron los siguientes: edad gestacional de 37 a 42 semanas, peso al nacer apropiado para la edad gestacional e inicio de la alimentación con leche infantil en las dos primeras semanas de vida. Se aleatorizó a los lactantes cuyas madres se pusieron en contacto con el hospital para recibir una de las dos leches infantiles. El contenido de ambas estaba basado en una leche infantil hidrolizada hipoalérgica que contenía seroproteína de leche de vaca complementada con 0,8 g/100 ml de GOS/FOS o con 0,8 g/100 ml de maltodextrina como placebo. La aleatorización se llevó a cabo utilizando una tabla de números aleatorios y el enmascaramiento se mantuvo codificando las dos leches infantiles del ensayo mediante la adición de los sufijos "N" u "O" al nombre del producto.

Las leches infantiles del estudio se administraron a voluntad.

Los lactantes podían recibir paralelamente lactancia materna y alimentación con biberón hasta la sexta semana de vida. Se excluyó del estudio a los lactantes cuyas madres empezaron a alimentarlos con leche infantil de acuerdo con los criterios de inclusión pero continuaron con lactancia materna durante más de seis semanas.

Se examinó mensualmente a los lactantes del estudio. Se entrevistó a los padres utilizando un diario. Para el análisis se emplearon los resultados obtenidos antes de iniciar la alimentación con leche infantil (día de examen 1) y a los 3 y 6 meses de edad (días de examen 2 y 3, respectivamente).

En cada visita se examinó la piel del lactante para detectar la posible presencia de DA con arreglo a los criterios diagnósticos descritos por Harrigan y Rabinowitz<sup>17</sup> y por Muraro y cols.<sup>18</sup>. Se consideró que un lactante tenía DA confirmada si presentaba los signos siguientes: prurito, afectación de la cara, el cráneo facial o la parte extensora de las extremidades, y duración de los síntomas de cuatro semanas como mínimo.

La gravedad de las alteraciones cutáneas se puntuó utilizando el índice SCORAD basándose en la extensión y la intensidad de los síntomas cutáneos, así como en los síntomas subjetivos de prurito y pérdida de horas de sueño tal como recomienda el Grupo de Trabajo Europeo sobre la DA<sup>19,20</sup>. La extensión de la DA se determinó utilizando la gráfica del SCORAD para los lactantes menores de 2 años de edad. Los síntomas subjetivos y la información sobre la frecuencia y la consistencia de las heces se obtuvieron en las entrevistas con los padres a partir de los datos que habían registrado en el diario. Todos los exámenes y entrevistas fueron realizados por dos de los autores (GM y SA). Los valores antropométricos y los datos de episodios de llanto, regurgitación, vómitos y características de las heces se utilizaron como parámetros secundarios para determinar la seguridad, el nivel de aceptación de las leches infantiles y la tolerancia. En cada visita del estudio se determinaron los parámetros del crecimiento en todos los lactantes. El peso corporal se determinó empleando una báscula con un nivel de exactitud de  $\pm 5$  g. La estatura desde la coronilla hasta el talón se determinó utilizando un tablero especial para recién nacidos y lactantes con una exactitud de  $\pm 1$  mm y el perímetro cefálico se determinó empleando una cinta métrica metálica con una exactitud de  $\pm 1$  mm.

Los episodios de llanto (puntuación de 1 a 3: 1 = prácticamente ninguno; 2 = llanto relacionado con la alimentación; 3 = llanto independiente de las comidas), de regurgitaciones (puntuación de 1 a 3: 1 = 0; 2 = 1-2; 3 = > 2 regurgitaciones por día) y de vómitos (puntuación de 1 a 3: 1 = 0; 2 = 1; 3 = > 1 episodios de vómito por día) se obtuvieron a partir de los datos comunicados por los padres en las entrevistas.

Se registraron la consistencia de las heces (puntuación de 1 a 5: 1 = acuosas; 2 = blandas; 3 = en trozos muy pequeños; 4 = con forma; 5 = duras) y la frecuencia de las deposiciones. La consistencia de las heces se evaluó basándose en el aspecto de la muestra fresca utilizada para el análisis, el cuestionario y las respuestas de los padres en la entrevista. La consistencia de cada muestra de heces se registró el día antes del día del estudio; la media de las puntuaciones obtenidas se empleó para caracterizar la consistencia de las heces de ese día.

Los padres de un subgrupo de 98 lactantes accedieron a recoger muestras de las heces de sus hijos para realizar un análisis microbiológico. Las muestras de heces se obtuvieron en las tres visitas de examen. Se homogeneizó un volumen de 0,2 g de una muestra de heces frescas en un medio de transporte con glicerol conservado en frío (10 ml de glicerol, 0,1 g de Oxoid, agua hasta 100 ml) y se congeló inmediatamente a  $-80$  °C. Las muestras se transportaron en hielo seco. Para identificar las bifidobacterias y los lactobacilos se utilizaron medios selectivos comercializados (bifidobacterias: Heipha N.º 20580e, Heidelberg, Alemania; lactobacilos: Rogosaagar Heipha 2068e modificado, Heidelberg, Alemania), tal como se ha descrito pre-

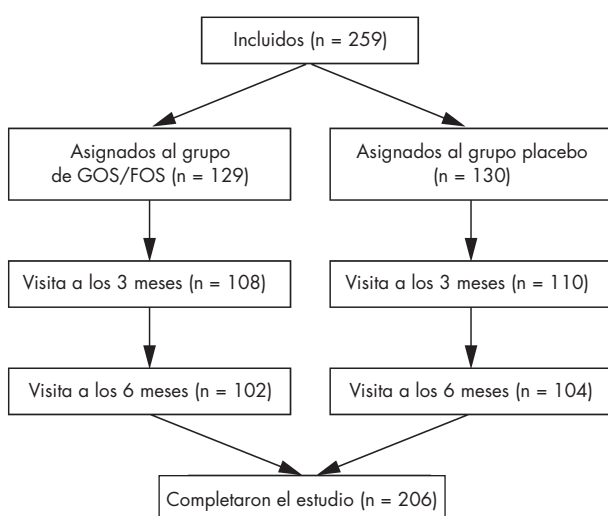

**Figura 1** Distribución de todos los lactantes incluidos en el estudio.

viamente<sup>21</sup>. Los resultados obtenidos se presentan en unidades formadoras de colonias (UFC)/g de heces.

#### Análisis estadístico

Los resultados se analizaron conforme al protocolo.

La aleatorización, homogénea con respecto al tiempo, se llevó a cabo utilizando el programa informático RAN-CODE (IDV Gauting, Alemania; números de raíz asignados en función del tiempo de reacción), con un tamaño de los bloques permutados al azar de cuatro. Los datos con intervalos (p. ej., antropométricos) de los lactantes de los dos grupos se compararon utilizando la prueba de la *t* bilateral. Los recuentos de bacterias en las muestras de heces se compararon con la prueba de la *U* de Mann-Whitney porque la distribución de los datos no era paramétrica.

Las puntuaciones con datos ordinales (p. ej., consistencia de las heces) de los lactantes de los dos grupos se compararon empleando la prueba de la *U* de Mann-Whitney.

Las puntuaciones con datos nominales (p. ej., llanto, vómitos, regurgitaciones) y otros datos nominales se

compararon analizando las tablas de los datos originales codificados (prueba de la  $\chi^2$ ). En el caso de las tablas de  $2 \times 2$ , se utilizó la prueba exacta de Fisher.

Para el análisis de los criterios principales de valoración, se calcularon los intervalos de confianza del 95% aplicando el método de puntuación de Wilson<sup>22</sup>.

El tamaño de la muestra se calculó basándose en el análisis de la incidencia de DA en el hospital en los años anteriores y suponiendo que la magnitud del efecto sería similar al comunicado con probióticos<sup>16</sup> en ese momento. Basándose en esta suposición, se calculó que si 108 sujetos por grupo completaran el protocolo, el estudio tendría una potencia del 80%. El período de inclusión del estudio fue de dos años completos para evitar los efectos estacionales. La tasa de abandono fue ligeramente mayor que la prevista (20% frente al 15%). Por tanto, el análisis estadístico se realizó con los datos de los 206 lactantes que completaron el estudio, en lugar de 216 como estaba previsto. Se consideró que un valor de  $p < 0,05$  era estadísticamente significativo.

#### RESULTADOS

En total se incluyeron 259 lactantes en el estudio (Fig. 1). Los datos clínicos más relevantes de la población del estudio se resumen en la Tabla 1. 53 lactantes abandonaron el estudio antes de su finalización, siendo el motivo principal de abandono la continuación o la reinstauración de la lactancia materna. Las características en el momento del nacimiento y los motivos de abandono de los lactantes de los dos grupos no fueron significativamente diferentes (Tabla 2).

Durante el período de estudio de seis meses, 10 lactantes (9,8%; IC del 95%, 5,4%–17,1%) del grupo de GOS/FOS y 24 (23,1%; IC del 95%, 16,0%–32,1%) del grupo placebo presentaron DA (Fig. 2).

En el grupo de lactantes con DA, las puntuaciones del índice SCORAD de los lactantes del grupo alimentado con leche infantil complementada con GOS/FOS y las de los del grupo alimentado con placebo no fueron significativamente diferentes (medianas [intervalo intercuartílico] a los 3 meses de edad de 9,8 (4,8) frente a 9,8 (7,5),  $p = 0,86$ , y a los 6 meses de edad de 8,9 (12,4) frente a 12,8 (5,5),  $p = 0,18$ ).

**Tabla 1** Datos clínicos más relevantes de la población del estudio

|                                                                             | Leche infantil con GOS/FOS | Leche infantil placebo | Valor de p |
|-----------------------------------------------------------------------------|----------------------------|------------------------|------------|
| Incluidos (n) (v/m)                                                         | 129 (65/64)                | 130 (63/67)            | ns         |
| Completaron el estudio (n) (v/m)                                            | 102 (52/50)                | 104 (49/55)            | ns         |
| Edad de la madre (años)*                                                    | 30,0 ± 5,7                 | ns                     |            |
| Número de hijos*                                                            | 1,53 ± 0,71                | 1,57 ± 0,77            | ns         |
| Parto vaginal (n [%])                                                       | 72 (70,6)                  | 69 (66,3)              | ns         |
| Lactantes cuya madre había padecido alergia (n)                             | 69                         | 71                     | ns         |
| Lactantes cuyo padre había padecido alergia (n)                             | 28                         | 27                     | ns         |
| Lactantes cuya madre y cuyo padre habían padecido alergia (n)               | 5                          | 6                      | ns         |
| Peso al nacer (g)*                                                          | 3.344 ± 456                | 3.376 ± 482            | ns         |
| Talla al nacer (cm)*                                                        | 49,2 ± 1,5                 | 49,4 ± 1,9             | ns         |
| Perímetro cefálico al nacer (cm)*                                           | 34,4 ± 1,2                 | 34,6 ± 1,2             | ns         |
| Edad en que recibió el primer biberón (días)*                               | 11,2 ± 7,0                 | 11,8 ± 9,2             | ns         |
| Edad en que recibió el primer biberón completo (días)*                      | 21,2 ± 10,1                | 21,5 ± 9,2             | ns         |
| Aumento de peso en los primeros 6 meses de vida (g/día)*                    | 27,4 ± 4,1                 | 26,4 ± 3,7             | ns         |
| Aumento de talla en los primeros 6 meses de vida (cm/semana)*               | 0,75 ± 0,14                | 0,74 ± 0,10            | ns         |
| Aumento del perímetro cefálico en los primeros 6 meses de vida (cm/semana)* | 0,33 ± 0,04                | 0,34 ± 0,05            | ns         |

\*Los datos son las medias ± DE; ns = no significativo.

**Tabla 2** Características de los abandonos

|                                                     | Leche infantil con GOS/FOS | Leche infantil placebo | Valor de p |
|-----------------------------------------------------|----------------------------|------------------------|------------|
| n (%)                                               | 27 (20,9%)                 | 26 (20,0%)             | ns         |
| Varones/mujeres                                     | 13/14                      | 14/12                  | ns         |
| Peso al nacer (g)*                                  | 3.350 ± 450                | 3.380 ± 460            | ns         |
| Talla al nacer (cm)*                                | 49,2 ± 1,7                 | 49,2 ± 1,8             | ns         |
| Motivos del abandono                                |                            |                        |            |
| Continuación/reinstauración de la lactancia materna | 22                         | 21                     | ns         |
| Endurecimiento de las heces                         | 0                          | 2                      | ns         |
| Flatulencia                                         | 1                          | 1                      | ns         |
| Traslado a otra ciudad                              | 1                          | 0                      | ns         |
| Sin información                                     | 3                          | 2                      | ns         |

\*Los datos son las medias ± DE; ns = no significativo.

En el subgrupo de lactantes con una serie completa de muestras de heces, la complementación con GOS/FOS produjo un aumento significativo del número de bifidobacterias en comparación con el grupo de placebo, pero no influyó significativamente en la concentración de lactobacilos (Tabla 3).

La dieta influyó significativamente en las características de las heces (frecuencia y consistencia de las heces) (Tabla 4).

En cuanto al grado de aceptación y la tolerancia de ambas leches infantiles, en el grupo alimentado con la leche infantil complementada con GOS/FOS la incidencia de episodios de regurgitación y llanto fue significativamente menor, aunque no se observaron diferencias en la incidencia de vómitos entre ambos grupos (Tabla 5).

No se registraron efectos adversos a lo largo del estudio según los datos registrados en los diarios por los padres y los resultados de los exámenes mensuales.

**Tabla 3** Recuentos de bifidobacterias y lactobacilos en unidades formadoras de colonias (UFC) por gramo de heces frescas en tres días de examen consecutivos

|                                | Leche infantil con GOS/FOS | Leche infantil placebo | Valor de p |
|--------------------------------|----------------------------|------------------------|------------|
| n (v/m)                        | 50                         | 44                     |            |
| Al principio del estudio       |                            |                        |            |
| Bifidobacterias (UFC/g heces)* | 8,17 (2,3)                 | 8,33 (2,4)             | ns         |
| Lactobacilos (UFC/g heces)*    | 4,70 (0,0)                 | 4,70 (0,6)             | 0,040      |
| A los 3 meses de edad          |                            |                        |            |
| Bifidobacterias (UFC/g heces)* | 9,56 (0,9)                 | 8,30 (1,1)             | < 0,0001   |
| Lactobacilos (UFC/g heces)*    | 6,04 (1,5)                 | 6,12 (2,1)             | ns         |
| A los 6 meses de edad          |                            |                        |            |
| Bifidobacterias (UFC/g heces)* | 10,28 (0,7)                | 8,65 (1,2)             | < 0,0001   |
| Lactobacilos (UFC/g heces)*    | 5,99 (3,6)                 | 5,90 (2,0)             | ns         |

\*Los datos son las medianas (intervalo intercuartílico); ns = no significativo.

**Tabla 4** Características de las heces a los 3 y 6 meses de edad

|                                                       | Leche infantil con GOS/FOS | Leche infantil placebo | Valor de p |
|-------------------------------------------------------|----------------------------|------------------------|------------|
| n (v/m)                                               | 102 (52/50)                | 104 (49/55)            |            |
| Al principio de la alimentación con leches infantiles |                            |                        |            |
| Frecuencia* (n/día)                                   | 2,59 ± 0,9                 | 2,39 ± 1,2             | ns         |
| Consistencia (puntuación)*                            | 2,3 ± 0,5                  | 2,2 ± 0,5              | ns         |
| Lactantes con una puntuación < 2 (n)                  | 20                         | 16                     |            |
| Lactantes con una puntuación > 4 (n)                  | 0                          | 0                      |            |
| A los 3 meses de edad                                 |                            |                        |            |
| Frecuencia* (n/día)                                   | 2,34 ± 0,8                 | 1,55 ± 0,6             | < 0,0001†  |
| Consistencia (puntuación)*                            | 2,08 ± 0,5                 | 2,82 ± 0,8             | < 0,0001‡  |
| Lactantes con una puntuación < 2 (n)                  | 28                         | 0                      |            |
| Lactantes con una puntuación > 4 (n)                  | 0                          | 0                      |            |
| A los 6 meses de edad                                 |                            |                        |            |
| Frecuencia* (n/día)                                   | 1,75 ± 0,6                 | 1,50 ± 0,6             | 0,0059†    |
| Consistencia (puntuación)*                            | 2,44 ± 0,7                 | 3,22 ± 0,9             | < 0,0001‡  |
| Lactantes con una puntuación < 2 (n)                  | 8                          | 0                      |            |
| Lactantes con una puntuación > 4 (n)                  | 0                          | 9                      |            |

\*Los datos son las medias ± DE; ns = no significativo.

† Prueba de la t.

‡ Prueba de la U.

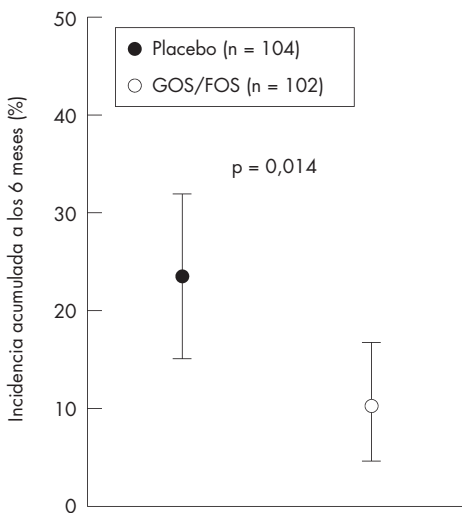

**Figura 2** Incidencia acumulada de DA a los 6 meses de edad en los grupos alimentados con leche infantil complementada con GOS y FOS o con maltodextrinas como placebo. Los datos son las medias (IC del 95%).

## DISCUSION

En el presente estudio, se ha comprobado que la adición de 0,8 g de GOS/FOS/100 ml a una leche infantil hidrolizada hipoalérgica (que contenía seroproteína de leche de vaca) redujo significativamente la incidencia acumulada de dermatitis atópica (DA) durante los seis primeros meses de vida. De acuerdo con nuestra experiencia, éste es el

primer estudio que demuestra que los oligosacáridos prebióticos pueden influir en la incidencia de DA.

La mayoría de las madres de los lactantes que participaron en este estudio tenía antecedentes de atopia, hecho que está muy relacionado con el riesgo de presentar DA a los 6 meses de edad<sup>23</sup>. Se sabe con certeza que la incidencia máxima de DA ocurre a los 6 meses de edad<sup>24</sup>, pero las incidencias absolutas publicadas varían considerablemente entre un estudio y otro. Se ha comunicado que la incidencia en lactantes con un riesgo similar a los del presente estudio es aproximadamente del 30%<sup>23,25</sup>.

En el presente estudio se utilizó una seroproteína de leche de vaca hidrolizada como base para las dos leches infantiles estudiadas, con arreglo a las recientes recomendaciones para el tratamiento nutricional de los lactantes con riesgo de atopia<sup>26</sup>, lo que podría explicar el hecho de que sólo se presentaran manifestaciones leves de DA<sup>27</sup>.

La hipótesis principal de este estudio era que los prebióticos de la dieta podían regular el desarrollo del sistema inmunitario después del nacimiento al modificar la microflora intestinal. Aunque no fue posible obtener muestras de heces de todos los lactantes, los datos del subgrupo con tales muestras demostraron que la adición de GOS/FOS tuvo un efecto significativo sobre los recuentos de bifidobacterias, similar al observado en un estudio realizado anteriormente en el mismo hospital<sup>10</sup> en el que se utilizaron métodos microbiológicos idénticos<sup>21</sup>. Al igual que en estudios previos, el efecto de la complementación con GOS/FOS sobre los recuentos de lactobacilos fue menos pronunciado. Sin embargo, en estudios en los que se han utilizado técnicas identificativas de biología molecular, se ha demostrado también claramente el efecto de la mezcla GOS/FOS sobre la colonización de lactobacilos<sup>28</sup>.

**Tabla 5** Regurgitación, vómitos y llanto a los 3 y 6 meses de edad

|                                  | Leche infantil con GOS/FOS | Leche infantil placebo | Valor de p |
|----------------------------------|----------------------------|------------------------|------------|
| n (v/m)                          | 102 (52/50)                | 104 (49/55)            |            |
| <b>A los 3 meses de edad</b>     |                            |                        |            |
| Regurgitación (n)                |                            |                        | 0,0192*    |
| 0 episodios/día                  | 75                         | 62                     |            |
| 1 episodio/día                   | 23                         | 27                     |            |
| 2 o más episodios/día            | 4                          | 15                     |            |
| Vómitos (n)                      |                            |                        | ns*        |
| 0 episodios/día                  | 99                         | 92                     |            |
| 1 episodio/día                   | 5                          | 10                     |            |
| 2 episodios/día                  | 0                          | 0                      |            |
| Llanto (n)                       |                            |                        | 0,0175*    |
| No                               | 66                         | 48                     |            |
| Relacionado con la alimentación  | 33                         | 54                     |            |
| Independiente de la alimentación | 3                          | 2                      |            |
| <b>A los 6 meses de edad</b>     |                            |                        |            |
| Regurgitación (n)                |                            |                        | 0,0027*    |
| 0 episodios/día                  | 81                         | 69                     |            |
| 1 episodio/día                   | 19                         | 19                     |            |
| 2 o más episodios/día            | 2                          | 16                     |            |
| Vómitos (n)                      |                            |                        | ns*        |
| 0 episodios/día                  | 95                         | 100                    |            |
| 1 episodio/día                   | 7                          | 4                      |            |
| 2 episodios/día                  | 0                          | 0                      |            |
| Llanto (n)                       |                            |                        | 0,0057*    |
| No                               | 76                         | 57                     |            |
| Relacionado con la alimentación  | 26                         | 44                     |            |
| Independiente de la alimentación | 0                          | 3                      |            |

\*Prueba de  $\chi^2$ ; ns = no significativo.

Cada vez hay más pruebas de que los oligosacáridos de la leche humana (OSLH) pueden influir en el sistema inmunitario, no sólo a través de la microflora intestinal, sino también al interactuar directamente con las células inmunitarias. Se ha demostrado que los OSLH afectan a la producción de citocinas y a la activación de linfocitos T derivados de la sangre del cordón umbilical humano *in vitro*<sup>29</sup>. Además, los OSLH pueden afectar a la formación de complejos de plaquetas y neutrófilos y a la activación de neutrófilos asociados con la sangre de voluntarios sanos. Para que se formen estos complejos son necesarias las selectinas, y los OSLH pueden influir en dicha formación<sup>30</sup>. Por tanto, los OSLH podrían ser componentes antiinflamatorios de la leche humana y una de las causas de que la incidencia de enfermedades inflamatorias, como la enterocolitis necrosante, sea menor en los lactantes alimentados con leche materna que en los alimentados con leche infantil<sup>31</sup>.

Recientemente también se han investigado ciertos efectos de los hidratos de carbono de la dieta, como los fructanos (inulina y oligofructosa), sobre la regulación del sistema inmunitario. En estudios realizados en animales, las primeras pruebas de un efecto inmunorregulador se observaron principalmente en células inmunitarias activadas en placas de Peyer; entre estas pruebas figuraron la producción de IL-10 y la citotoxicidad de los linfocitos citolíticos naturales, la concentración de IgA secretora en el íleon y el ciego y la producción de citocinas por los esplenocitos. Se postuló que algunos de los efectos observados podrían deberse a la interacción de los prebióticos con receptores de los hidratos de carbono situados en las células inmunitarias<sup>32</sup>. En un modelo murino de alergia de tipo I, la reacción alérgica producida tras la sensibilización con ovoalbúmina se atenuó en aquellos animales cuya dieta contenía galactoligosacáridos de cadena corta y fructoligosacáridos de cadena larga<sup>33</sup>.

Misikangas y cols.<sup>34</sup> describieron una asociación entre la inulina en la dieta y el crecimiento de adenomas en un modelo de ratón con múltiples neoplasias intestinales. En contraste con esta observación única, en una revisión de 12 estudios (realizados en animales y seres humanos) Pool-Zobel concluyó que los fructanos del tipo de la inulina reducen el riesgo de cáncer de colon<sup>35</sup>. El *Scientific Committee on Nutrition* consideró que la mezcla de GOS/FOS estudiada es segura para la nutrición de lactantes en una concentración de hasta 0,8 g/100 ml<sup>36</sup>.

Los resultados del presente estudio no permiten extraer conclusiones sobre cuál es el mecanismo causante del efecto observado sobre la DA. Dada la complejidad de las estructuras de los OSLH, la lactancia materna, además de estimular la microflora intestinal, también tiene otros efectos beneficiosos. En comparación, la principal actividad de la mezcla prebiótica estudiada es su influencia en la microflora intestinal. En resumen, los datos del presente estudio demuestran que una mezcla de GOS/FOS en la dieta tiene un efecto significativo sobre la incidencia de DA a los 6 meses de edad. Aunque es necesario realizar más estudios para conocer completamente el mecanismo causante del efecto regulador del sistema inmunitario de los prebióticos estudiados, los datos respaldan la posible utilidad de los prebióticos como intervención dietética para la prevención primaria de la alergia durante la lactancia.

### Lo que ya se sabe sobre este tema

- La microflora intestinal influye de forma importante en el desarrollo del sistema inmunitario después del nacimiento.
- Los prebióticos de la dieta (una mezcla de galactoligosacáridos y fructoligosacáridos de cadena larga) influyen para que la microflora intestinal esté dominada por las bifidobacterias.

### Información que aporta este estudio

- La mezcla de prebióticos estudiada (0,8 g/100 ml de GOS/FOS) reduce la incidencia de DA en lactantes de riesgo, lo que confirma la hipótesis de que estos prebióticos pueden presentar efecto inmunorregulador.

### AGRADECIMIENTOS

Los autores desean agradecer al Dr. Kock, del Laborzentrum Pohlheim, Alemania, su ayuda en el análisis microbiológico, al Dr. Carlo Gelmetti su ayuda en temas dermatológicos y al Sr. Stanley Norman sus consejos editoriales.

### Adscripciones de los autores

**G. Moro, S. Arslanoglu:** Centro de Nutrición Infantil, Maternidad Macedonio Melloni, Milán, Italia.

**B. Stahl, J. Jelinek, G. Boehm:** Numico Research Germany, Friedrichsdorf, Alemania.

**U. Wahn:** Charité Campus Virchow Klinikum, Berlín, Alemania.

**G. Boehm:** Hospital Infantil Sophia, Universidad Erasmus, Rotterdam, Países Bajos.

Financiación: el estudio se financió en parte con una beca de Numico Research, Friedrichsdorf, Alemania, y el programa EARNEST (Food-CT-00678).

Conflictos de intereses de los autores: ninguno declarado.

### BIBLIOGRAFÍA

- 1 **Holgate ST.** The epidemic of allergy and asthma. *Nature* 1999;**402**(6760 suppl):B2-4.
- 2 **Ahberg N,** Hesselmar B, Aberg B, *et al.* Increase of asthma, allergic rhinitis and eczema in Swedish schoolchildren between 1979 and 1991. *Clin Exp Allergy* 1995;**25**:815-19.
- 3 **Kemp A,** Björksen B. Immune deviation and the hygiene hypothesis: a review of the epidemiological evidence. *Pediatr Allergy Immunol* 2003;**14**:74-80.
- 4 **Björkstén B,** Sepp E, Julge K, *et al.* Allergy development and the intestinal microflora during the first year of life. *J Allergy Clin Immunol* 2001;**108**:516-20.
- 5 **Kunz C,** Rudloff S, Baier W, *et al.* Oligosaccharides in human milk: structural, functional, and metabolic aspects. *Ann Rev Nutr* 2000;**20**:699-722.
- 6 **Boehm G,** Stahl B. Oligosaccharides. In: Mattila-Sandholm T, ed. *Functional dairy products*. Cambridge: Woodhead, 2003:203-43.
- 7 **Boehm G,** Fanaro S, Jelinek J, *et al.* Prebiotic concept for infant nutrition. *Acta Paediatr* 2003;**92**(suppl 441):64-7.
- 8 **Boehm G,** Jelinek J, Stahl B, *et al.* Prebiotics in infant formulas. *J Clin Gastroenterol* 2004;**38**:S76-9.
- 9 **Boehm G,** Lidesiri M, Casetta P, *et al.* Supplementation of an oligosaccharide mixture to a bovine milk formula increases counts of faecal bifidobacteria in preterm infants. *Arch Dis Child Fetal Neonatal Ed* 2002;**86**:F178-81.
- 10 **Moro G,** Minoli I, Mosca M, *et al.* Dosage related bifidogenic effects of galacto- and fructo-oligosaccharides in formula fed term infants. *J Pediatr Gastroenterol Nutr* 2002;**34**:291-5.
- 11 **Schmelze H,** Wirth S, Skopnik H, *et al.* Randomised double-blind study of the nutritional efficacy and bifidogenicity of a new infant formula containing partially hydrolyzed protein, a high beta palmitic acid level, and nondigestible oligosaccharides. *J Pediatr Gastroenterol Nutr* 2003;**36**:343-51.
- 12 **Knol J,** Scholtens B, Kafka C, *et al.* Colon microflora in infant fed formula with galacto- and fructo-oligosaccharides: more like breast fed infants. *J Pediatr Gastroenterol Nutr* 2005;**40**:36-42.
- 13 **Prescott SL.** Development of allergen-specific T-cell memory in atopic and normal children. *Lancet* 1999;**353**:186-200.

- 14 **Illi S**, von Mutius E, Lau S, *et al.* The natural course of atopic dermatitis from birth to age 7 years and the association with asthma. *J Allergy Clin Immunol* 2004;**113**:925-31.
- 15 **Köhler H**, McCormick BA, Walker WA. Bacterial-enterocyte crosstalk: cellular mechanisms in health and disease. *J Pediatr Gastroenterol Nutr* 2003;**36**:175-85.
- 16 **Kalliomäki M**, Salminen S, Arvilommi H, *et al.* Probiotics in primary prevention of atopic diseases: a randomized placebo-controlled trial. *Lancet* 2001;**357**:1076-9.
- 17 **Harrigan E**, Rabinowitz LG. Atopic dermatitis. *Pediatr Allergy Immunol* 1999;**19**:383-9.
- 18 **Muraro A**, Dreborg S, Halken S, *et al.* Dietary prevention of allergic diseases in infants and small children. Part II: Evaluation of methods in allergy prevention studies and sensitization markers. Definitions and diagnostic criteria for allergic diseases. *Pediatr Allergy Immunol* 2004;**14**:196-205.
- 19 **Kunz B**, Oranje AP, Labreze L, *et al.* Clinical validation and guidelines for the SCORAD index: Consensus Report of the European Task Force on Atopic Dermatitis. *Dermatology* 1997;**195**:10-19.
- 20 **Anon.** Severity scoring of atopic dermatitis: the SCORAD index. Consensus Report of the European Task Force on Atopic Dermatitis. *Dermatology* 1993;**186**:23-31.
- 21 **Fanaro S**, Vigi V, Chierici R, *et al.* Fecal flora measurements of breast fed infants using an integrated transport and culturing system. *Acta Paediatr* 2003;**92**:634-5.
- 22 **Newcombe RG.** Two-sided confidence intervals for the single proportion: comparison of seven methods. *Stat Med* 1998;**17**:857-72.
- 23 **Moore MM**, Rifas-Shiman SL, Rich-Edwards JW, *et al.* Perinatal predictors of atopic dermatitis occurring in the first six months of life. *Pediatrics* 2004;**113**:468-74.
- 24 **Bruno G**, Milita O, Ferrara M, *et al.* Prevention of atopic diseases in high risk babies (long-term follow-up). *Allergy Proc* 1993;**14**:181-6.
- 25 **Laitinen K**, Kalliomäki M, Poussa T, *et al.* Evaluation of diet and growth in children with and without atopic eczema: follow-up study from birth to 4 years. *Br J Nutr* 2005;**94**:565-74.
- 26 **Host A**, Koletzko B, Dreborg S, *et al.* Dietary products used in infants for treatment and prevention of food allergy. Joint Statement of the European Society for Paediatric Allergology and Clinical Immunology (ESPACI) Committee on Hypoallergenic Formulas and the European Society for Paediatric Gastroenterology, Hepatology and Nutrition (ESPGHAN) Committee on Nutrition. *Arch Dis Child* 1999;**81**:80-4.
- 27 **Berg von A**, Koletzko S, Grübl A, *et al.* The effect of hydrolyzed cow's milk formula for allergy prevention in the first year of life: The German Infant Nutritional Intervention Study, a randomized double-blind trial. *J Allergy Clin Immunol* 2003;**111**:533-40.
- 28 **Bakker-Zierikzee AM**, Alles M, Knol J, *et al.* Effects of infant formula containing a mixture of galacto- and fructo-oligosaccharides on viable *Bifidobacterium animalis* on the intestinal microflora during the first 4 months of life. *Br J Nutr* 2005;**94**:783-90.
- 29 **Eiwegger T**, Stahl B, Schmitt J, *et al.* Human milk-derived oligosaccharides and plant-derived oligosaccharides stimulate cytokine production of cord blood T-cells in vitro. *Pediatr Res* 2004;**56**:536-40.
- 30 **Bode L**, Rudloff S, Kunz C, *et al.* Human milk oligosaccharides reduce platelet-neutrophil complex formation leading to a decrease in neutrophil beta 2 integrin expression. *J Leukoc Biol* 2004;**76**:820.
- 31 **van den Berg A**, van Elburg RM, Teerlink T, *et al.* A randomized controlled trial of enteral glutamine supplementation in very low birth weight infants: plasma amino acid concentrations. *J Pediatr Gastroenterol Nutr* 2005;**41**:66-71.
- 32 **Watzl B**, Girrbach S, Roller M. Inulin, oligofructose and immunomodulation. *Br J Nutr* 2005;**93**(suppl 1):S49-55.
- 33 **Garsen J**, Vos P, M'Rabet L, *et al.* Oral exposure to a mixture of galacto-oligosaccharides and long chain fructo-oligosaccharides as a new concept for allergy prevention. *Allergy Clin Immunol Int* 2005;(suppl 1):S72.
- 34 **Misikangas M**, Pajari AM, Pääviranta E, *et al.* Promotion of adenoma growth by dietary inulin is associated with increase in cyclin D1 and decrease in adhesion proteins in Min/+ mice mucosa. *J Nutr Biochem* 2005;**16**:402-9.
- 35 **Pool-Zobel B.** Inulin-type fructans and reduction in colon cancer risk: review of experimental and human data. *B J Nutr* 2005;**93**(suppl 1):S73-90.
- 36 **Scientific Committee on Food.** Additional statement on the use of resistant short chain carbohydrates (oligofructosyl-saccharose and oligo-galactosyl-lactose) in infant formulae and follow-on formulae. *SCF/CS/NUT/IF/47 Final*. 14 December, 2001.

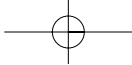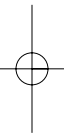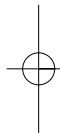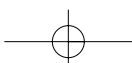

Supplement: archdisch_adc.2006.098251_1.pdf [file archdisch_adc.2006.098251_1.pdf]
